## EDITORIAL VIEWS

3. Kopman AF, Yee PS, Neuman GG: Correlation of the train-of-four fade ratio with clinical signs and symptoms of residual curarization in awake volunteers. *ANESTHESIOLOGY* 1997; 86:765-71

4. Bevan DR, Smith CE, Donati F: Postoperative neuromuscular blockade: a comparison between atracurium, vecuronium, and pancuronium. *ANESTHESIOLOGY* 1988; 69:272-6

5. Fawcett WJ, Dash A, Francis GA, Liban JB, Cashan JN: Recovery from neuromuscular blockade: Residual curarization following atracurium or vecuronium by bolus dosing or infusions. *Acta Anaesthesiol Scand* 1995; 39:288-93

6. Viby-Mogensen J, Jorgensen BC, Ørding H: Residual curarization in the recovery room. *ANESTHESIOLOGY* 1979; 50:539-41

7. Kopman AF, Ng J, Zank LM, Neuman GG, Yee PS: Residual postoperative paralysis: Pancuronium versus mivacurium, does it matter. *ANESTHESIOLOGY* 1996; 85:1253-9

8. Miller RD: How should residual neuromuscular blockade be detected? *ANESTHESIOLOGY* 1989; 70:379-80

9. Lubarsky DA, Glass PSA, Ginsberg B, Dear G, Dentz ME, Gan

TJ, Sanderson IC, Mythen MG, Dufore S, Pressley CC, Gilbert WC, White WD, Alexander ML, Coleman RL, Rogers M, Reves JG: The Successful implementation of pharmaceutical practice guidelines. Analysis of associated outcomes and cost savings. *ANESTHESIOLOGY* 1997; 86:1145-60

10. Fisher DM: Surrogate end points: Are they meaningful? *ANESTHESIOLOGY* 1994; 81:795-6

11. Ali HH, Wilson RS, Savarese JJ, Kitz RJ: The effect of d-tubocurarine on indirectly elicited train-of-four muscle response and respiratory measurements in humans. *Br J Anaesth* 1975; 47:570-4

12. Isono S, Ide T, Kochi T, Mizuguchi T, Nishino T: Effects of partial paralysis on the swallowing reflex in conscious humans. *ANESTHESIOLOGY* 1991; 75:980-4

13. Beemer GH, Bjorksten AR, Dawson PJ, Dawson RJ, Heenan PJ, Robertson BA: Determinants of the reversal time of competitive neuromuscular block by anticholinesterases. *Br J Anaesth* 1991; 66:469-75

14. Gelman S: Right, wrong, and surrogate endpoints: I. *ANESTHESIOLOGY* 1995; 82:1084

Anesthesiology

1997; 87:1031-2

© 1997 American Society of Anesthesiologists, Inc.  
Lippincott-Raven Publishers

## Application of Practice Guidelines to Anesthesiology

FOUR recent studies in the anesthesia literature have reported successful and similar programs to change anesthesiologists' practice patterns.<sup>1-4</sup> This issue of *ANESTHESIOLOGY* contains one such report.<sup>1</sup> Two studies (by Freund *et al.*<sup>1</sup> and Lubarsky *et al.*<sup>2</sup>) tested the success of their efforts to change practice patterns by comparing drug use during a historical control period to that in a later intervention period at single hospitals. The other two studies (by Cohen *et al.*<sup>3</sup> and Rose *et al.*<sup>4</sup>) performed such an analysis at a control and a study hospital. Increases in the proportion of patients treated using the practice guidelines were then compared between the two hospitals. All four studies simultaneously monitored changes in patient demographics and outcomes. The studies examined practice guidelines for

neuromuscular blocking drugs,<sup>1</sup> expensive anesthetic drugs,<sup>2</sup> prevention of nausea,<sup>3</sup> and management of postoperative pain.<sup>4</sup>

Comparison of how these groups achieved changes in anesthesiologists' practice patterns are important. Two studies<sup>1,2</sup> succeeded at changing anesthesiologists' practice patterns by combining education, practice guidelines, and paper barriers. Completion of a form at an operating room pharmacy<sup>1</sup> or advance approval of the attending anesthesiologist<sup>2</sup> was required to obtain the more expensive drugs. The former study<sup>1</sup> showed that the paper barriers produced changes that were maintained for 2 yr. The latter study<sup>2</sup> discussed that maintenance of the changed behavior was achieved, in part, by providing anesthesiologists with individualized feedback on their (1) deviation from the practice guidelines and (2) drug administration compared with their peers. The other two studies<sup>3,4</sup> succeeded at changing practice patterns by combining education, practice guidelines, and individualized feedback. The individualized feedback included the number of patients cared for during the promoted measures.

Together, the results of these<sup>1-4</sup> studies stand in contrast to some previous studies in anesthesiology that failed to show that education and practice guidelines change physicians' practice patterns. Anesthesiologists'

This Editorial View accompanies the following article:  
Freund PR, Bowdle TA, Posner KL, Kharasch ED, Burkhart VD: Cost-effectiveness reduction of neuromuscular-blocking drug expenditures. *ANESTHESIOLOGY* 1997; 87:1044-9.

Accepted for publication July 7, 1997.

Key words: Clinical pathway. Economics/anesthesia. Practice guideline. Quasi-experiments.



practice patterns can be changed<sup>1-4</sup> to decrease costs,<sup>1,2</sup> to try to improve patient outcome,<sup>3,4</sup> or both. However, changing practice patterns requires more than just education and practice guidelines. Either "negative" barriers limiting undesired practice (e.g., signatures, voice release, or forms),<sup>1,2</sup> "positive" individualized feedback,<sup>3,4</sup> or both<sup>2</sup> should be combined with education to change physicians' behavior.

**Franklin Dexter, M.D., Ph.D.**  
Associate Professor  
Department of Anesthesia  
University of Iowa  
Iowa City, Iowa 52242  
franklin-dexter@uiowa.edu

## References

1. Freund PR, Bowdle TA, Posner KL, Kharasch ED, Burkhart VD: Cost-effective reduction of neuromuscular blocking drug expenditures. *ANESTHESIOLOGY* 1997; 87:1044-9
2. Lubarsky DA, Glass PSA, Ginsberg B, Dear GDL, Dentz ME, Gan TJ, Sanderson IC, Mythen MG, Dufore S, Pressley CC, Gilbert WC, White WD, Alexander ML, Coleman RL, Rogers M, Reves JG for the SWiPE Group: The successful implementation of pharmaceutical practice guidelines: analysis of associated outcomes and costs savings. *ANESTHESIOLOGY* 1997; 86:1145-60
3. Cohen MM, Rose DK, Yee DA: Changing anesthesiologists practice patterns—Can it be done? *ANESTHESIOLOGY* 1996; 85:260-9
4. Rose DK, Cohen MM, Yee DA: Changing the practice of pain management. *Anesth Analg* 1997; 84:764-72

Anesthesiology  
1997; 87:1032-3

© 1997 American Society of Anesthesiologists, Inc.  
Lippincott-Raven Publishers

## "Exciting" Aspects of Opiate Receptor Signal Transduction

THE process that causes a cell to produce a particular response after binding of an agonist to its receptor is called *signal transduction*. Of particular interest to anesthesiologists is the transmembrane signaling that follows agonist binding to ligand-gated ion channels (e.g.,  $\gamma$ -aminobutyric acid<sub>A</sub> receptors) or G protein-coupled receptors (e.g., adrenergic and opiate receptors). In the former case, the receptor and the channel that translocate chloride anions are on the same protein, whereas in the case of the opiate receptors at least three separate proteins participate in the signal transduction; i.e., the receptor, the G protein, and the effector. With that many "moving parts," the opportunity to modulate such a system abounds. When one considers that each family of receptors has many subtypes (e.g., there are

nine adrenergic receptor subtypes), which can couple to more than 20 different G proteins and nearly 100 effector mechanisms, it becomes easy to understand how a single species of agonist can give rise to a plethora of diverse biologic responses.

In this issue of *ANESTHESIOLOGY*, Gutstein *et al.*<sup>1</sup> tested the hypothesis that opiate receptors are coupled to mitogen-activated protein kinase cascades, which induce changes in cellular function by phosphorylation of cytoplasmic and nuclear proteins. Until a few years ago, such a notion would have seemed farfetched because the hyperpolarization effects of opioids in neuronal cells could be easily explained by a well-characterized activation of potassium channel (promoting escape of intracellular cations), inhibition of calcium channels (preventing calcium from entering into the cell), or both. Although these transduction mechanisms can explain the inhibitory effect of opioids on neuronal excitability, they do not provide an answer for the multitude of excitatory effects (e.g., tolerance, dependence/addiction, muscle rigidity) that opioids also exhibit at the cellular level.

The authors have developed cDNAs for each of the rat opiate receptors, which, when spliced into an appropriate vector, can be introduced into cells, which then express "pure" populations of these receptor subtypes. The fidelity of transfection and protein expression en-

This Editorial View accompanies the following article: Gutstein HB, Rubie EA, Mansour A, Akil H, Woodgett JR: Opioid effects on mitogen-activated protein kinase signaling cascades. *ANESTHESIOLOGY* 1997; 87:1118-26.

Accepted for publication July 23, 1997.

Key words: Dependence. Extracellular signal-related kinases. Opiates. Opioid receptors. p38 mitogen-activated protein kinase. Signal transduction. Stress-activated protein kinase. Tolerance.
